# Supplementary material
Source: PubMed Central journal article supplement (PMC5025686)

## Supplemental Table and Figures

**Table S1.** Oligonucleotide primers used in this study.

| Primer name | Sequence                                       | Restriction sites          |
|-------------|------------------------------------------------|----------------------------|
| Halo-Bm     | 5'ATCGGATCCGAAATCGGTACTGGCTTTCATTCGAC3'        | <i>Bam</i> HI              |
| Halo-NcSc   | 5'TTAGAGCTCGGCCATGGCGTTATCGCTCTGAAAGTACAGATC3' | <i>Sac</i> I, <i>Nco</i> I |
| Pho1-ATG    | 5'TTCCATGGCTAGCGTGGCGAGCGATCGGGGCGTGCA3'       | <i>Nco</i> I               |
| 274seq-r    | 5'ATCCAGATGGAGTTCTGAGGTCAT3'                   |                            |
| DPE1-F      | 5'ATCCCACGGCACCGTCCACGTGTAGCCGTGCAA3'          |                            |
| DPE1-Sal-R  | 5'GAAGTCGACTTAGAGCCGGTTGTACAGTCCAAGCAATTC3'    | <i>Sal</i> I               |
| DPE1-Bam-F  | 5'CGCGGATCCATGGCGGTGGCGCCCGACAAGGAGGAG3'       | <i>Bam</i> HI              |
| DPE1_650-F  | 5'GAGAGCTCAGAACGCAATATGACTGCTT3'               |                            |
| DPE1_1210-F | 5'TCTGAGTCAAAAGTAGCGCTGGTTGGAAGCT3'            |                            |
| DPE1-Sal    | 5'GGAGTCGACGCGGTGGCGCCCGACAAGGAGGAG3'          | <i>Sal</i> I               |
| DPE1-Kpn    | 5'CAGGGTACCTTAGAGCCGGTTGTACAGTCCAAG3'          | <i>Kpn</i> I               |

**Figure S1. Modeled structure of rice Pho1.** The structure was modeled on the X-ray crystal structure of *Arabidopsis thaliana* Pho2 using YASARA Structure (version 14.12.2)(Krieger et al. 2002). L80 region is denoted by orange color and its starting and ending amino acid residues are indicated. Maltotriose is shown in yellow and pyridoxal 5-phosphate (PLP) in green.

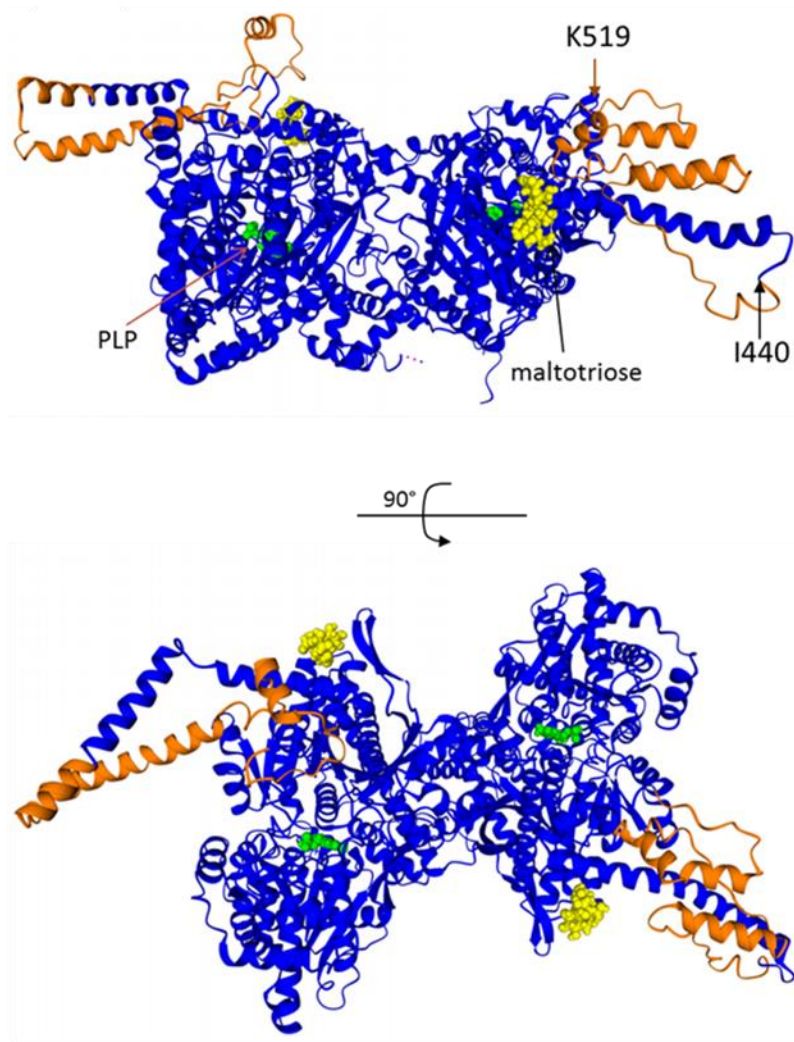

## Reference

Krieger, E., Koraimann, G., and Vriend, G. (2002) Increasing the precision of comparative models with YASARA NOVA--a self-parameterizing force field. *Proteins* **47**, 393-402

**Figure S2. DNA and protein sequences of HaloTag fusion proteins.** Sequences in green, red, blue, and black denote polyhistidine (His<sub>6</sub>) tag, HaloTag, fused proteins (GFP, OsPho1, OsPho1ΔL80, and OsDpe1), and part of the expression plasmid pSH582, respectively. Some important restriction enzyme sites are also shown.

```

=====
pSH582: DNA sequence of His6-HaloTag-GFP
CTCGAGAAATCATAAAAAATTTATTTGCTTTGTGAGCGGATAACAATTATAATAGATTCAATTGTGAGCGGATAACA
ATTTACACAGAATTCATTAAGAGGAGAAATTAAGTATGAGAGGATCGCATCACCATCACCATCACGGATCCGAAA
                                                                    BamHI

TCGGTACTGGCTTTCCATTTCGACCCCCATTATGTGGAAGTCTCTGGGCGAGCGCATGCACTACGTTCGATGTTGGTCCG
CGCGATGGCACCCCTGTGCTGTTTCTGCACGGTAACCCGACCTCCTCCTACGTGTGGCGCAACATCATCCCGCATGT
TGCACCGACCCATCGCTGCATTGCTCCAGACCTGATCGGTATGGGCAAATCCGACAAACCAGACCTGGGTTATTTCT
TCGACGACCACGTCCGCTTCATGGATGCCTTCATCGAAGCCCTGGGTCTGGAAGAGGTCGTCTGGTCATTACAGAC
TGGGGCTCCGCTCTGGGTTTCCACTGGGCCAAGCGCAATCCAGAGCGCGTCAAAGGTATTGCATTTATGGAGTTCAT
CCGCCCTATCCCGACCTGGGACGAATGGCCAGAATTTGCCCGCGAGACCTTCCAGGCCTTCCGCACCACCGACGTGC
GCCGCAAGCTGATCATCGATCAGAACGTTTTTATCGAGGGTACGCTGCCGATGGGTGTCGTCCGCCCGCTGACTGAA
GTCGAGATGGACCATTACCGCGAGCCGTTTCTGAATCCTGTTGACCGCGAGCCACTGTGGCGCTTCCCAAACGAGCT
GCCAATCGCCGGTGAGCCAGCGAACATCGTCGCGCTGGTCAAGAATACATGGACTGGCTGCACCAGTCCCCTGTCC
CGAAGCTGCTGTTCTGGGGCACCCAGGCCTTCTGATCCCACCGGCCGAAGCCGCTCGCCTGGCCAAAAGCCTGCCT
AACTGCAAGGCTGTGGACATCGGCCCGGGTCTGAATCTGCTGCAAGAAGACAACCCGGACCTGATCGGCAGCGAGAT
CGCGCGCTGGCTGTCGACGCTCGAGATTTCCGGCGAGCCAACCCTGAGGATCTGTACTTTTCAGAGCGATAACGCCA
TGGTAGATCTGACTAGTAAAGGAGAAGAACTTTTCACTGGAGTTGTCCCAATTCTTGTTGAATTAGATGGTGATGTT
NcoI
AATGGGCACAAATTTTCTGTCTAGTGGAGAGGGTGAAGGTGATGCAACATACGGAAAACCTTACCCTTAAATTTATTTG
CACTACTGGAAAACCTACCTGTTCCGTGGCCAACACTTGTCACTACTTTCTCTTATGGTGTTCATGCTTTTCAAGAT
ACCCAGATCATATGAAGCGGCACGACTTCTTCAAGAGCGCCATGCCTGAGGGATACGTGCAGGAGAGGACCATCTTC
TTCAAGGACGACGGGAACATAAGACACGTGCTGAAGTCAAGTTTGAGGGAGACACCCTCGTCAACAGGATCGAGCT
TAAGGGAATCGATTTCAAGGAGGACGGAAACATCCTCGGCCACAAGTTGGAATACAACATAACTTCCACAACGTAT
ACATCATGGCCGACAAGCAAAAAGAACGGCATCAAAGCCAACCTTCAAGACCCGCCACAACATCGAAGACGGCGGCGTG
CAACTCGCTGATCATTATCAACAAAATACTCCAATTGGCGATGGCCCTGTCTTTTACCAGACAACCATTACCTGTC
CACACAATCTGCCCTTTCGAAAAGATCCCAACGAAAAGAGAGACCACATGGTCCTTCTTGAGTTTGTAACAGCTGCTG
GGATTACACATGGCATGGATGAACTATACAAAGCTAGCTAGATGCATTCGCGAGGTACCGAGCTCGGTACCCCGGGT
                                                                    KpnI SacI KpnI SmaI
CGACCTGCAGCCAAGCTTAATTAGCTGAGCTTGGACTCCTGTTGATAGATCCAGTAATGACCTCAGAACTCCATCTG
SalI PstI HindIII
GATTTGTTTCAGAACGCTCGGTTGCCGCCGGGCGTTTTTTTATTGGTGAGAATCCAAGCTAGCTTGGCGAGATTTTCAG
GAGCTAAGGAAGCTAAAATGGAGAAAAAATCACTGGATATACCACCGTTGATATATCCCAATGGCATCGTAAAGAA
CATTTTGAGGCATTTTCAGTCAGTTGCTCAATGTACCTATAACCAGACCGTTTCAGCTGGATATTACGGCCTTTTTTAAA
GACCGTAAAGAAAAAATAAGCAAGTTTTTATCCGGCCTTTATTACATTCTTGCCCGCCTGATGAATGCTCATCCGG
AATTTTCGTATGGCAATGAAAGACGGTGAGCTGGTGATATGGGATAGTGTTACCCTTGTTACACCGTTTTCCATGAG
CAAACGAAACGTTTTTCATCGCTCTGGAGTGAATACCACGACGATTTCCGGCAGTTTTCTACACATATATTCGCAAGA
TGTGGCGTGTACGGTGAACCTGGCCTATTTCCCTAAAGGGTTTTATTGAGAATATGTTTTTTCGTCTCAGCCAATC
CCTGGGTGAGTTTACCAGTTTTGATTTAAACGTGGCCAATATGGACAACCTTCTTCGCCCCCGTTTTTACCATGCAT
GGGCAAATATTATACGCAAGGCGACAAGGTGCTGATGCCGCTGGCGATTACAGTTTCATCATGCCGTTTTGTGATGGCT
TCCATGTCGGCAGAATGCTTAATGAATTACAACAGTACTGCGATGAGTGGCAGGGCGGGGCGTAATTTTTTTAAGGC
AGTTATTGGTGCCCTTAAACGCCTGGGGTAATGACTCTCTAGCTTGAGGCATCAAATAAAACGAAAGGCTCAGTCGA
AAGACTGGGCCTTTTCGTTTTATCTGTTGTTTGTGCGGTGAACGCTCTCCTGAGTAGGACAAATCCGCCCTCTAGAGCT
GCCTCGCGCTTTTCGGTGATGACGGTGAAAACCTCTGACACATGCAGCTCCCGGAGACGGTCACAGCTTGTCTGTAA
GCGGATGCCGGGAGCAGACAAGCCGTCAGGGCGCGTCAGCGGGTGTGGCGGGTGTGGGGGCGCAGCCATGACCCA
GTCACGTAGCGATAGCGGAGTGTATACTGGCTTAACTATGCGGCATCAGAGCAGATTGTAAGTGCAGAGTGCACCATAT
GCGGTGTGAAATACCGCACAGATGCGTAAGGAGAAAATACCGCATCAGGCGCTTCTCCGCTTCTTCGCTCACTGACT
CGCTGCGCTCGGTGCTTCGGCTGCGGGCGAGCGGTATCAGCTCACTCAAAGGCGGTAATACGGTTATCCACAGAATCA
GGGGATAACGCAGGAAAGAACATGTGAGCAAAAAGGCCAGCAAAAAGGCCAGGAACCGTAAAAAGGCCGCGTTGCTGGC
GTTTTTCCATAGGCTCCGCCCCCTGACGAGCATCACAAAATCGACGCTCAAGTCAGAGGTGGCGAAACCCGACAG

```

GACTATAAAGATAACCAGGCGTTTTCCCCCTGGAAGCTCCCTCGTGGCTCTCCTGTTCCGACCCTGCCGCTTACCGGA  
TACCTGTCCGCTTTTCTCCCTTCGGGAAGCGTGGCGCTTTCTCATAGCTCACGCTGTAGGTATCTCAGTTCGGTGT  
GGTGGTTCGCTCCAAGCTGGGCTGTGTGCACGAACCCCCCGTTCCAGCCGACCCTGCGCCTTATCCGGTAACCTATC  
GTCTTGAGTCCAACCCGGTAAGACACGACTTATCGCCACTGGCAGCAGCCACTGGTAACAGGATTAGCAGAGCGAGG  
TATGTAGGCGGTGCTACAGAGTTCTTGAAGTGGTGGCCTAACTACGGCTACACTAGAAGGACAGTATTTGGTATCTG  
CGCTCTGCTGAAGCCAGTTACCTTCGGAAAAAGAGTTGGTAGCTCTTGATCCGGCAAACAAACCACCGCTGGTAGCG  
GTGGTTTTTTTTGTTTGCAAGCAGCAGATTACGCGCAGAAAAAAGGATCTCAAGAAGATCCTTTGATCTTTTTCTACG  
GGGTCTGACGCTCAGTGGAACGAAAACCTCACGTTAAGGGATTTTGGTTCATGAGATTATCAAAAAGGATCTTCACCTA  
GATCCTTTTAAATTAATAAATGAAGTTTTAAATCAATCTAAAGTATATATGAGTAAACTTGGTCTGACAGTTACCAAT  
GCTTAATCAGTGAGGCACCTATCTCAGCGATCTGTCTATTTTCGTTTCATCCATAGTTGCCTGACTCCCCGCTCGTGTAG  
ATAACTACGATAACGGGAGGGCTTACCATCTGGCCCCAGTGTGCAATGATACCGCGAGACCCACGCTCACCGCTCC  
AGATTTATCAGCAATAAACACGACCCAGCCGGAAGGCGGAGCGCAGAAGTGGTCTGCAACTTTATCCGCTCCATCC  
AGTCTATTAATTGTTGCCGGGAAGCTAGAGTAAGTAGTTCCGCGAGTTAATAGTTTGCGCAACGTTGTTGCCATTGCT  
ACAGGCATCGTGGTGTACGCTCGTCTGTTGGTATGGCTTCATTAGCTCCGTTCCCAACGATCAAGGCGAGTTAC  
ATGATCCCCCATGTTGTGCAAAAAGCGGTTAGCTCCTTCGGTCTCCGATCGTTGTCAGAAGTAAGTTGGCCGAG  
TGTTATCACTCATGGTTATGGCAGCACTGCATAATTCTCTTACTGTGATGCCATCCGTAAGATGCTTTTTCTGTGACT  
GGTGAGTACTCAACCAAGTCATTCTGAGAATAGTGTATGCGGCGACCGAGTTGCTCTTGCCCGGCGTCAATACGGGA  
TAATACCGCGCCACATAGCAGAACCTTAAAAGTGCTCATCATTGGAAAACGTTCTTCGGGGCGAAAACCTCTCAAGGA  
TCTTACCGCTGTTGAGATCCAGTTCGATGTAACCCACTCGTGCACCCAACTGATCTTCAGCATCTTTTACTTTTACC  
AGCGTTTCTGGGTGAGCAAAAACAGGAAGGCAAAATGCCGCAAAAAGGGAATAAGGGCGACACGGAAATGTTGAAT  
ACTCATACTCTTCTTTTTTCAATATTATTGAAGCATTATCAGGGTTATTGTCTCATGAGCGGATACATATTTGAAT  
GTATTTAGAAAAATAAACAAATAGGGGTTCCGCGCACATTTCCCCGAAAAGTGCCACCTGACGTCTAAGAAACCATT  
ATTATCATGACATTAACCTATAAAAATAGGCGTATCACGAGGCCCTTTTCGTTCTCAC

**pSH583: protein sequence of His<sub>6</sub>-HaloTag-GFP (565 aa; 63.8 kDa)**

MRGSHHHHHHGS EIGTGFPDFPHYVEVLGERMHYVDVGPDRDGPVLFHLGNPTSSYVWRNII PHVAPTHRCIAPDLI  
GMGKSDKPDLYFFDDHVRFMDAFIEALGLEEVVLVIHDWGSALGFHWAKRNPVERVKGI AFMEFIRPIPTWDEWPEF  
ARETFQAFRTT DVGRLKLIIDQNVFIEGLTPMGVVRPLTEVEMDHYREPFLNPVDREPLWRFPNELPIAGEPANIVAL  
VEEYMDWLHQSPVPKLLFWGTGPGVLI PPAEAARLAKSLPNCKAVDIGPGLNLLQEDNPD LIGSEIARWLSTLEISGE  
PTTEDLYFQSDNAMVDLTSKGEELFTGVVPI LVELDGDVNGHKFSVSGEGEGDATYGLKTLKFICTTGKLPVPWPPTL  
VTTFSYGVQCF SRYPDHMKRHDFFKSAMPEGYVQERTIFFKDDGNYKTRAEVKFEGDTLVNRIELKGI DFKEDGNIL  
GHKLEYNNSHN VYIMADKQKNGIKANFKTRHNIEDGGVQLADHYQQNTPIGDGPVLLPDNHYLSTQSALS KDPNEK  
RDHMLLEFVTAAGIT HGMDELYKAS

=====  
**pSH585: DNA sequence of His<sub>6</sub>-HaloTag-OsPho1**

CTCGAGAAATCATAAAAAATTTATTTGCTTTGTGAGCGGATAACAATTATAATAGATTCAATTGTGAGCGGATAACA  
ATTTACACAGAATTCATTAAAGAGGAGAAATTA ACTATGAGAGGATCGCATCACCATCACCATCAGCGATCCGAAA

BamHI

TCGGTACTGGCTTTCCATTGACCCCCATTATGTGGAAGTCTGGGCGAGCGCATGCACTACGTCGATGTTGGTCCG  
CGCGATGGCACCCCTGTGCTGTTCTGCACGGTAACCCGACCTCCTCCTACGTGTGGCGCAACATCATCCCGCATGT  
TGCACCGACCCATCGCTGCATTGCTCCAGACCTGATCGGTATGGGCAAATCCGACAAACAGACAGCTGGGTATTTCT  
TCGACGACCACGTCGCTTCATGGATGCCTTCATCGAAGCCCTGGGTCTGGAAGAGGTGCTCCTGGTCAATTCAGC  
TGGGGCTCCGCTCTGGGTTTTCCACTGGGCCAAGCGCAATCCAGAGCGCGTCAAAGGTATTGCATTTATGGAGTTCAT  
CCGCCCTATCCCGACCTGGGACGAATGGCCAGAATTTGCCCGGAGACCTTCCAGGCCTTCCGCACCACCGACGTCG  
GCCGCAAGCTGATCATCGATCAGAACGTTTTTATCGAGGGTACGCTGCCGATGGGTGTCGTCGCCCCGCTGACTGAA  
GTCGAGATGGACCATTACCGCGAGCCGTTCTGAACTCTGTTGACCGCGAGCCACTGTGGCGCTTCCCAAACGAGCT  
GCCAATCGCCGGTGAGCCAGCGAACATCGTCGCGCTGGTCAAGAATACATGGACTGGCTGCACCAGTCCCCTGTCC  
CGAAGCTGCTGTTCTGGGGCACCCAGGCGTTCTGATCCCACCGCCGAAGCCGCTCGCCTGGCCAAAAGCCTGCCT  
AACTGCAAGGCTGTGGACATCGGCCCGGTCTGAATCTGCTGCAAGAAGACAACCCGGACCTGATCGGCAGCGAGAT  
CGCGCGCTGGCTGTGACGCTCGAGATTTCCGGCGAGCCAACCACTGAGGATCTGTACTTTT CAGAGCGATAACGCCA  
TGGctagcGTGGCGAGCGATCGGGCGTGCAGGGTCTGGTGTGCCCCGAGGAAGAGATTTCAAGTGTGCTAAATTCC

NcoI

ATCGATTCTCTACCATTCATCAAACATTAAGCACCATGCGGAGTTCACACCAGTATTCTCTCCAGAGCACTTTTC  
ACCTCTGAAGGCTTACCATGCAACTGCTAAAAGTGTCTTTGATACTCTGATAATGAACTGGAATGCAACATATGACT  
ATTACGACAGAACAATGTGAAGCAAGCGTATTACCTGTCCATGGAGTTTTTACAGGGAAGAGCTCTCACTAATGCC

GTTGGTAACCTTGAGCTAACTGGACAATACGCAGAAGCACTACAACAACCTTGGACACAGCCTAGAGGATGTTGCTAC  
CCAGGAGCCAGATGCTGCCCTTGGGAATGGTGGTCTAGGCCGGTTAGCTTCTCTGTTTCTTGGATTCTCTGGCAACCC  
TAAATTATCCAGCATGGGGATATGGACTTCGATACAAACATGGCCTCTTTAAGCAAATCATAACGAAGGATGGTCAG  
GAGGAGGTAGCTGAAAATTGGCTCGAGATGGGAAATCCTTGGGAGATTGTAAGAACCGATGTCTCCTATCCTGTGAA  
GTTCTATGGTAAAGTGGTTGAAGGCACCTGATGGGAGGATGCACTGGATTGGAGGAGAAAAATATCAAGGTTGTTGCTC  
ATGATATCCCTATTCTGGCTACAAGACTAAAACCTACCAACAATCTTCGTCTTTGGTCAACAACAGTGCCATCACAA  
GATTTTCGATTTGGAAGCTTTTAATGCTGGAGATCATGCAAGTGCATATGAAGCTCATCTAAATGCTGAAAAGATATG  
TCACGTACTGTATCCTGGGGACGAATCACCAGAGGGGAAAGTTCTTCGCCTGAAGCAACAATATACATTATGCTCAG  
CCTCACTACAGGATATTATTGCTCGTTTTCGAGAGGAGAGCTGGTGATTCTCTCAGCTGGGAGGACTTCCCCTCTAAA  
GTTGCAGTGCAGATGAATGACACTCACCAACACTGTGCATTCTCAGTTGATGAGAATATTGATTGATGTTAAAGG  
GTTAAGCTGGAATGAGGCTTGGAGTATCACAGAAAGAACTGTGGCATAACAAACCACCGTGCTTCTGAAGCTC  
TGGAGAAGTGGAGCTTGGACATAATGCAGAAACTTCTTCCTCGGCATGTTGAAATCATAGAAAAAATTGATGGGGAG  
CTGATGAACATCATTATCTCAAAATACGGAACAGAAGATACTTCACTGTTAAAAAAGAAGATTAAGAAAATGAGAAT  
CTTAGACAACATTGACCTACCAGATTCTATTGCCAAACTATTTGTGAAACCAAAAGAGAAAAAAGAATCTCCTGCTA  
AATTGAAAGAGAAAATTGCTTGTCAAATCTCTAGAGCCTAGTGTTGTGGTTGAGGAGAAAACTGTGTCCAAAGTAGAG  
ATAAACGAGGACTCTGAGGAGGTGGAGGTAGACTCTGAAGAAGTTGTGGAGGCAGAAAAACGAGGACTCTGAGGATGA  
GTTAGATCCATTTGTAAAATCAGATCCTAAATTACCTAGAGTTGTCCGAATGGCTAACCTTTGTGTTGTTGGTGGGC  
ATTCGGTTAATGGTGTGGCTGCGATTACAGCGAGATTGTGAAAGAAGATGTATTCAACAGCTTTTATGAGATGTGG  
CCCGCTAAATTTCAAATAAAAACAAATGGAGTGACTCCTAGACGTTGGATTTCGGTTTTGTAATCCTGAATTAAGTGC  
AATCATTTCAAATGGATAGGATCTGATGATTGGGTTTTGAACACTGATAAATCTGCTGAATTAAGAAGTTTGCTG  
ATGATGAGGATCTGCAATCAGAATGGCGTGCTGCTAAAAGGCTAACAAGGTGAAGGTTGTTTCTCTCATAAGAGAA  
AAAACAGGATATATCGTCAGTCCAGATGCAATGTTTGACGTTCAGGTGAAAAGGATCCATGAGTATAAGCGACAGCT  
GCTAAATATCCTTGGAAATTGTCTACCGCTACAAGAAGATGAAAGAAATGAGTGCAAAAAGACAGAATAAATAGCTTTG  
TTCCAAGGGTATGCATATTTGGTGGGAAAGCATTTGCCACTTACGTACAGGCAAAGAGGATAGTGAAGTTTATTACA  
GATGTTGCAGCTACTGTAAATCATGATCCAGAAATTGGAGATCTATTGAAGGTTGTATTTATTCCAGATTATAATGT  
TAGTGTGCTGAGGCGCTAATCCCTGCCAGTGAATTGTCTCAGCATATCAGTACTGCTGGAATGGAAGCTAGTGGAA  
CCAGCAACATGAAGTTTGAATGAATGGATGTATCCTTATTGGAACCTTTGGATGGTGCTAATGTGGAATCAGAGAG  
GAGGTTGGAGAGGAAAACTTTTTCTTTTTGGTGTGAGGCACATGAAATTTGCTGGTTTTAAGGAAAGAGAGAGCCCA  
GGGAAAGTTTTGTGCCTGACCAAGATTCTGAAGAGGTTAAGAGATTTGTCCGCAGTGGGGTCTTTGGAACCTTACAAT  
ACGATGACTTTGATGGGTTCTCTGGAAGGAAATGAAGTTATGGGCGTGCAGACTATTTTCTGTTGGTAAAGATTTT  
CCCAGCTACATTGAATGCCAGGAGAAGGTTGATAAAGCATACCGCGATCAGAACTATGGACAAGGATGTCAATCCT  
CAACACAGCCAGTTCTCCAAGTTCAACAGCGACCGGACGATTACAGAGTACGCCAAGGACATCTGGGACATCAAGC  
CTGTATCCTGCCCTAAGGTACCGAGCTCGAATTGGGTCGACCAGCTTAATTAGCTGAGCTTGGACTCCTGTTGATA

KpnI      SacI                      SalI

GATCCAGTAATGACCTCAGAACTCCATCTGGATTTGTTTCCAGAACGCTCGGTTGCCGCCGGGCGTTTTTTTATTGGTGA  
GAATCCAAGCTAGCTTGGCGAGATTTTCAGGAGCTAAGGAAGCTAAAATGGAGAAAAAATCACTGGATATAACCACC  
GTTGATATATCCCAATGGCATCGTAAAGAACATTTTTGAGGCATTTTCAGTCAGTTGCTCAATGTACCTATAACCAGAC  
CGTTTCAGCTGGATATTACGGCCTTTTTAAAGACCGTAAAGAAAAATAAGCACAAAGTTTTATCCGGCCTTTATTACAA  
TTCTTGGCCCGCTGATGAATGCTCATCCGGAATTTTCGTATGGCAATGAAAGACGGTGAGCTGGTGATATGGGATAGT  
GTTACCCCTTGTACACCGTTTTTCCATGAGCAAACCTGAAACGTTTTTCATCGCTCTGGAGTGAATACCACGACGATTT  
CCGGCAGTTTTCTACACATATATTGCAAGATGTGGCGTGTACGGTGAAAACCTGGCCTATTTCCCTAAAGGGTTTTA  
TTGAGAATATGTTTTTCGTCTCAGCCAATCCCTGGGTGAGTTTACCAGTTTTGATTTAAACGTGGCCAATATGGAC  
AACTTCTTCGCCCCCGTTTTTACCATGCATGGGCAAATATTATACGCAAGGCGACAAGGTGCTGATGCCGCTGGCGA  
TTCAGGTTTCATCATGCCGTTTTGTGATGGCTTCCATGTCCGCAGAATGCTTAATGAATTACAACAGTACTGCGATGAG  
TGGCAGGGCGGGGCGTAATTTTTTTAAGGCAGTTATTGGTGGCCTTAAACGCCTGGGGTAATGACTCTCTAGCTTGA  
GGCATCAAATAAAAACGAAAGGCTCAGTCGAAAGACTGGGCCTTTTCGTTTTATCTGTTGTTTGTTCGGTGAACGCTCTC  
CTGAGTAGGACAAAATCCGCCCTCTAGAGCTGCCTCGCGCTTTTCGGTGATGACGGTGAAAACCTCTGACACATGCAG  
CTCCCGGAGACGGTCACAGCTTGTCTGTAAGCGGATGCCGGGAGCAGACAAGCCCGTCAGGGCGCGTCAGCGGGTGT  
TGGCGGGTGTTCGGGGCGAGCCATGACCCAGTCACGTAGCGATAGCGGAGTGATACTGGCTTAACTATGCGGCATC  
AGAGCAGATTGTAAGTACTGAGAGTGCACCATATGCGGTGTGAAATACCGCACAGATGCGTAAGGAGAAAAATACCGCATCA  
GGCGCTCTTCCGCTTCCCTCGCTCACTGACTCGCTGCGCTCGGTGCTTCCGGCTGCGGGCAGCGGTATCAGCTCACTCA  
AAGGCGGTAATACGGTTATCCACAGAATCAGGGGATAACGCAGGAAAGAACATGTGAGCAAAAAGGCCAGCAAAAAGGC  
CAGGAACCGTAAAAGGCCGCGTTGCTGGCGTTTTTCCATAGGCTCCGCCCCCTGACGAGCATCACAAAAATCGAC  
GCTCAAGTCAGAGGTGGCGAAACCCGACAGGACTATAAAGATAACCAGGCGTTTTCCCTGGAAGCTCCCTCGTGCGC  
TCTCCTGTTCCGACCCTGCCGCTTACCGGATACCTGTCCGCTTTTCTCCCTTCGGGAAGCGTGGCGCTTTCTCATAG  
CTCACGCTGTAGGTATCTCAGTTCCGGTGTAGGTGTTTCGCTCCAAGCTGGGCTGTGTGCACGAACCCCCCGTTCCAGC  
CCGACCGCTGCGCCTTATCCGGTAACTATCGTCTTGGAGTCCAACCCGGTAAGACACGACTTATCGCCACTGGCAGCA

GCCACTGGTAACAGGATTAGCAGAGCGAGGTATGTAGGCGGTGCTACAGAGTTCTTGAAGTGGTGGCCTAACTACGG  
CTACACTAGAAGGACAGTATTTGGTATCTGCGCTCTGCTGAAGCCAGTTACCTTCGGAAAAAGAGTTGGTAGCTCTT  
GATCCGGCAAACAAACCACCGCTGGTAGCGGTGGTTTTTTTTGTTTGAAGCAGCAGATTACGCGCAGAAAAAAGGA  
TCTCAAGAAGATCCTTTGATCTTTTCTACGGGGTCTGACGCTCAGTGAACGAAAACCTCACGTTAAGGGATTTTGGT  
CATGAGATTATCAAAAAGGATCTTCCACCTAGATCCTTTTTAAATTAATAAATGAAGTTTTAAATCAATCTAAAGTATAT  
ATGAGTAAACTTTGGTCTGACAGTTACCAATGCTTAATCAGTGAGGCACCTATCTCAGCGATCTGTCTATTTTCGTTCA  
TCCATAGTTGCCTGACTCCCCGTCGTGTAGATAACTACGATACGGGAGGGCTTACCATCTGGCCCCAGTGCTGCAAT  
GATACCGCGAGACCCACGCTCACCGGCTCCAGATTTATCAGCAATAAACCCAGCCAGCCGGAAGGGCCGAGCGCAGAA  
GTGGTCTGCAACTTTATCCGCCTCCATCCAGTCTATTAATTGTTGCCGGGAAGCTAGAGTAAGTAGTTCGCCAGTT  
AATAGTTTGCACAACGTTGTTGCCATTGCTACAGGCATCGTGGTGTACGCTCGTCTGTTTGGTATGGCTTCATTACAG  
CTCCGGTTCCCAACGATCAAGGCGAGTTACATGATCCCCATGTTGTGCAAAAAGCGGTTAGCTCCTTCGGTCCCTC  
CGATCGTTGTGAGAAGTAAGTTGGCCGAGTGTATCACTCATGGTTATGGCAGCACTGCATAAATTTCTACTGTCTC  
ATGCCATCCGTAAGATGCTTTTTCTGTGACTGGTGAGTACTCAACCAAGTCATTCTGAGAATAGTGTATGCGGCGACC  
GAGTTGCTCTTGGCCGGCGTCAATACGGGATAATACCGCGCCACATAGCAGAACTTTAAAAGTGCTCATCATTGGAA  
AACGTTCTTGGGGCGAAAACCTCTCAAGGATCTTACCGCTGTTGAGATCCAGTTCGATGTAACCCACTCGTGACCC  
AACTGATCTTCAGCATCTTTTACTTTACCAGCGTTTCTGGGTGAGCAAAAACAGGAAGGCAAAATGCCGCAAAAA  
GGGAATAAGGGCGACACGGAAATGTTGAATACTCATACTCTTCTTTTTCAATATTATTGAAGCATTATCAGGGTT  
ATTGTCTCATGAGCGGATACATATTTGAATGTATTTAGAAAAATAAACAAATAGGGGTTCCGCGCACATTTCCCCGA  
AAAGTGCCACCTGACGTCTAAGAAACCATTATTATCATGACATTAACCTATAAAAATAGGCGTATCACGAGGCCCTT  
TCGTCTTAC

**pSH585: Protein sequence of His<sub>6</sub>-HaloTag-OsPho1 (1250 aa; 141.1 kDa)**

MRGSHHHHHHSEIGTGFPDPHYVEVLGERMHYVDVGPDRDGPVLFHLGNPTSSYVWRNIIIPHVAPTHRCIAPDLI  
GMGKSDKPDLYFFDDHVRFMDFIEALGLEEVVLVIHDWGSALGFHWAKRNPVVKGI AFMEFIRPIPTWDEWPEF  
ARETFQAFRTTDDVGRKLIIDQNVFIEGTLPMGVVRPLTEVEMDHYREPFLNPDREPLWRFPNELPIAGEPANIVAL  
VEEYMDWLHQSPVPKLLFWGTGPGVLIIPAEARLAKSLPNCKAVDIGPGLNLLQEDNPDIGSEIARWLSTLEISGE  
PTTEDLYFQSDNAMASVASDRGVQGSVSPREEEISSVLNSIDSSTIASNIKHAEFTPVFSPHFSPKAYHATAKSV  
LDTLIMNWNATYDYYDRNTVQAYYLSMEFLQGRALTNVGNLELTGQYAEALQQLGHSLEDVATQEPDAALGNGL  
GRLASCFLDSLATLNYPAWGYGLRYKHGLFKQIIITKDGQEEVAENWLEMGNPWEIVRTDVSYPVKFYGKVVVEGTDGR  
MHWIGGENIKVVAHDIPIPGYKTKTTNNLRLWSTTVPSQDFDLEAFNAGDHASAYEAHLNAEKICHVLYPGDESPEG  
KVLRLKQQYTLCSASLQDI IARFERRAGDSLWEDFPSKVAVQMNDTHPTLCIPELMRILIDVKGLSWNEAWSITER  
TVAYTNHTVLPPEALEKWSLDIMQKLLPRHVEIEIKIDGELMNIISKYGTEDTSLKKKIKEMRILDNIDLDPDSIAK  
LFVFKPEKKESPAKLKEKLLVKSLEPSVVVEEKTVSKVEINEDSEEVEVDSEEVVEAENEDSEDELDPFVKSDPKLP  
RVVRMANLCVVGHSVNGVAAIHSEIVKEDVFNSFYEMWPAKFNKNTNGVTPRRWIRFCNPELSAIIISKWIGSDDWV  
LNTDKLAELKKFADDEDLQSEWRAAKKANKVQVSLIREKTGYIVSPDMFVQVKRIHEYKQRLNLIIGLIVYRYKK  
MKEMSAKDRINSFVPRVCI FGGKAFATYVQAKRIVKFI TDVAATVNHDP EIGDLLKVVFI PDYNVSAEALIPASEL  
SQHISTAGMEASGTSNMKFAMNGCILIGTLDGANVEIREEVEENFFLFGAEAEH IAGLRKERAQGKFVDPDRFEV  
KRFVRSVGFVTYNYDDLMSLEGNEGYGRADYFLVGKDFPSYIECQEKVDKAYRDQKLWTRMSILNTASSKFNDR  
TIHEYAKDIWDIKPVILP

=====

**pSH642: DNA sequence of His<sub>6</sub>-HaloTag-OsPho1ΔL80**

CTCGAGAAATCATAAAAAATTTATTTGCTTTGTGAGCGGATAACAATTATAATAGATTCAATTGTGAGCGGATAACA  
ATTTACACAGAATTCATTAAGAGGAGAAATTAACATGAGAGGATCGCATCACCATCACCATCAGGATCCGAAA

BamHI

TCGGTACTGGCTTTCCATTGACACCCATTATGTGGAAGTCTGGGCGAGCGCATGCACTACGTCGATGTTGGTCCG  
CGCGATGGCACCCCTGTGCTGTTTCTGCACGGTAACCCGACCTCCTCCTACGTGTGGCGCAACATCATCCCAGTGT  
TGCACCGACCCATCGCTGCATTGCTCCAGACCTGATCGGTATGGGCAAATCCGACAAACCAGACCTGGGTTATTTCT  
TCGACGACCACGTCGCTTCATGGATGCCTTCATCGAAGCCCTGGGTCTGGAAGAGGTCGTCCTGGTCATTACGAC  
TGGGGCTCCGCTCTGGGTTTCCACTGGGCCAAGCGCAATCCAGAGCGCGTCAAAGGTATTGCATTTATGGAGTTCAT  
CCGCCCTATCCCAGCTGGGACGAATGGCCAGAATTTGCCCGGAGACCTTCCAGGCCTTCCGCACCACCGACGTCG  
GCCGCAAGCTGATCATCGATCAGAACGTTTTTATCGAGGGTACGCTGCCGATGGGTGTCGTCGCCCCGCTGACTGAA  
GTCGAGATGGACCATTACCGCGAGCCGTTTCTGAATCCTGTTGACCGCGAGCCACTGTGGCGCTTCCCAAACGAGCT  
GCCAATCGCCGGTGGAGCCAGCGAACATCGTCGCGCTGGTCAAGAATACATGGACTGGCTGCACCAGTCCCCTGTCC  
CGAAGCTGCTGTTCTGGGGCACCCAGGCGTTCTGATCCACCGGCCGAAGCCGCTCGCCTGGCCAAAAGCCTGCCT

AACTGCAAGGCTGTGGACATCGGCCCGGGTCTGAATCTGCTGCAAGAAGACAACCCGGACCTGATCGGCAGCGAGAT  
CGCGCGCTGGCTGTGACGCTCGAGATTTCCGGCGAGCCAACCACTGAGGATCTGTACTTTTCAGAGCGATAACGCCA  
TGGCTAGCGTGGCGAGCGATCGGGGCGTGCAGGGTCTGGTGTGCGCCGAGGAAGAGATTTCAAGTGTGCTAAATTCC

NcoI

ATCGATTCTCTACCATTGCATCAAACATTAAGCACCATGCGGAGTTACACCAGTATTCTCTCCAGAGCACTTTTC  
ACCTCTGAAGGCTTACCATGCAACTGCTAAAAGTGTCTTTGATACTCTGATAATGAACTGGAATGCAACATATGACT  
ATTACGACAGAACAATGTGAAGCAAGCGTATTACCTGTCCATGGAGTTTTTACAGGGAAGAGCTCTACTAATGCC  
GTTGGTAACCTTGAGCTAACTGGACAATACGCAGAAGCACTACAACAACCTGGACACAGCCTAGAGGATGTTGCTAC  
CCAGGAGCCAGATGCTGCCCTTGGGAATGGTGGTCTAGGCCGGTTAGCTTCTGTCTTTCTTGGATTCTCTGGCAACCC  
TAAATTATCCAGCATGGGGATATGGACTTCGATACAAACATGGCCTCTTTAAGCAAATCATAACGAAGGATGGTCAG  
GAGGAGGTAGCTGAAAATGGCTCGAGATGGGAAATCTTGGGAGATTGTAAGAACCAGTGTCTCTCTATCTGTGAA  
GTTCTATGGTAAAGTGGTTGAAGGCACCTGATGGGAGGATGCACCTGGATTGGAGGAGAAAATATCAAGGTTGTTGCTC  
ATGATATCCCTATTCTGGCTACAAGACTAAAACCTACCAACAATCTTCGTCTTTGGTCAACAACAGTGCCATCACAA  
GATTTTCGATTTGGAAGCTTTTAATGCTGGAGATCATGCAAGTGCATATGAAGCTCATCTAAATGCTGAAAAGATATG  
TCACGTACTGTATCCTGGGGACGAATCACCAGAGGGGAAAAGTTCTTCGCTGAAGCAACAATATACATTATGCTCAG  
CCTCACTACAGGATATTATTGCTCGTTTTCGAGAGGAGAGCTGGTATTCTCTCAGCTGGGAGGACTTCCCCTCTAAA  
GTTGCAGTGCAGATGAATGACACTCACCCAACACTGTGCATTCTGAGTTGATGAGAATATTGATTGATGTTAAAGG  
GTTAAGCTGGAATGAGGCTTGGAGTATCACAGAAAGAAGTGTGGCATAACAAAACACACGGTGTCTTCTGAAGCTC  
TGGAGAAGTGGAGCTTGGACATAATGCAGAAACTTCTTCTCGGCATGTTGAAATCATAGAAAAAATTGATGGGGAG  
CTGATGAACATCATTATCTCAAATACGGAACAGAAGATACTTCACTGTTAAAAAAGAAGATTAAGAAATGAGAAT  
CTTAGAgAaTTCAGATCCTAAATTACCTAGAGTTGTCCGAATGGCTAACCTTTGTGTTGTTGGTGGGCATTTCGGTTA  
ATGGTGTGGCTGCGATTACAGCGAGATTGTGAAAGAAGATGATTCAACAGCTTTTATGAGATGTGGCCCGCTAAA  
TTTCAAATAAAAACAAATGGAGTGACTCCTAGACGTTGGATTTCGGTTTTTGAATCCTGAATTAAGTGAATCATTTC  
AAAATGGATAGGATCTGATGATTGGGTTTTTGAACACTGATAAACTTGTGTAATTAAGAAGTTTTGCTGATGATGAGG  
ATCTGCAATCAGAATGGCGTGTCTGCTAAAAGGCTAACAAGGTGAAGGTTGTTTTCTCTATAAGAGAAAAAACAGGA  
TATATCGTCAGTCCAGATGCAATGTTTGACGTTTCCAGGTGAAAAGGATCCATGAGTATAAGCGACAGCTGCTAAATAT  
CCTTGGAAATTGTCTACCGCTACAAGAAGATGAAAGAAATGAGTGCAAAAGACAGAATAAATAGCTTTGTTCCAAGGG  
TATGCATATTTGGTGGGAAAGCATTTCGCCACTTACGTACAGGCAAAGAGGATAGTGAAGTTTATTACAGATGTTGCA  
GCTACTGTAAATCATGATCCAGAAATTGGAGATCTATTGAAGTTGTATTTATTCCAGATTATAATGTTAGTTGCTGC  
TGAGGCGCTAATCCCTGCCAGTGAATTGTCTCAGCATATCAGTACTGGAATGGAAGCTAGTGAAGCAGCAACA  
TGAAGTTTGAATGAATGGATGTATCCTTATTGGAACCTTGGATGGTGTAAATGTGGAAATCAGAGAGGAGGTTGGA  
GAGGAAAACCTTTTTCTTTTTTGGTGTGAGGCACATGAAATTGCTGGTTTTAAGGAAAGAGAGAGCCAGGGAAAAGTT  
TGTGCCTGACCCAAGATTTCGAAGAGGTTAAGAGATTTGTCCGCGAGTGGGGTCTTTGGAACCTTACAACACTACGATGACT  
TGATGGGTTCTCTGGAAGGAAATGAAGGTTATGGGCGTGCAGACTATTTTTCTTGTGGTAAAGATTTCCCCAGCTAC  
ATTGAATGCCAGGAGAAGGTTGATAAAGCATAACCGCGATCAGAAACTATGGACAAGGATGTCAATCCTCAACACAGC  
CAGTTTCTCCAAGTTCAACAGCGACCCGGACGATTACAGGATACGCCAAGGACATCTGGGACATCAAGCCTGTCTATCC  
TGCCCTAAGGTACCGAGCTCGAATTGGGTCGACCAGCTTAATTAGCTGAGCTTGGACTCCTGTTGATAGATCCAGTA

KpnI SacI SalI

ATGACCTCAGAACTCCATCTGGATTTGTTTTCAGAACGCTCGGTTGCCGCCGGGCGTTTTTTTTATTGGTGAAGATCCAAG  
CTAGCTTGGCGAGATTTTTCAGGAGCTAAGGAAGCTAAAATGGAGAAAAAATCACTGGATATAACCACCGTTGATATA  
TCCCAATGGCATCGTAAAGAACATTTTGGAGCATTTCAGTCAGTTGCTCAATGTACCTATAACCAGACCGTTTCAGCT  
GGATATTACGGCCTTTTTAAAGACCGTAAAGAAAAATAAGCACAAGTTTTATCCGGCCTTTATTACATTCTTGCCC  
GCCTGATGAATGCTCATCCGGAATTTTCGTATGGCAATGAAAGACGGTGAGCTGGTGTATATGGGATAGTGTTCACCTT  
TGTTACACCGTTTTCCATGAGCAAACCTGAAACGTTTTTCATCGCTCTGGAGTGAATACCACGACGATTTCCGGCAGTT  
TCTACACATATATTCGCAAGATGTGGCGTGTACGGTGAACCTGGCCTATTTCCCTAAAGGGTTTTATTGAGAATA  
TGTTTTTTCGTCTCAGCCAATCCCTGGGTGAGTTTACCAGTTTTGATTTAAACGTGGCCAATATGGACAACCTTCTTC  
GCCCCGTTTTTACCATGCATGGGCAAATATTATACGCAAGGCGACAAGGTGCTGATGCCGCTGGCAGATTTCAGGTTT  
ATCATGCCGTTTTGTGATGGCTTCCATGTCCGCGAAGTCTTAATGAATTACAACAGTACTGCGATGAGTGGCAGGGC  
GGGGCGTAATTTTTTTAAGGCAGTTATTGGTGCCTTAAACGCCTGGGGTAATGACTCTCTAGCTTGGAGCATCAAA  
TAAAACGAAAGGCTCAGTCGAAAGACTGGGCCTTTTCGTTTTATCTGTTGTTTTGTCGGTGAACGCTCTCCTGAGTAGG  
ACAAATCCGCCCTCTAGAGCTGCCTCGCGCGTTTTCGGTGATGACGGTGAACCTCTGACACATGCAGCTCCCGGAG  
ACGGTACAGCTTGTCTGTAAGCGGATGCCGGGAGCAGACAAGCCCGTCAGGGCGCGTCAGCGGGTGTGGCGGGTG  
TCGGGGCGCAGCCATGACCCAGTCACGTAGCGATAGCGGAGTGTATACTGGCTTAACTATGCGGCATCAGAGCAGAT  
TGTACTGAGAGTGCACCATATGCGGTGTGAAATACCGCACAGATGCGTAAGGAGAAAAATACCGCATCAGGCGCTCTT  
CCGCTTCTCGCTCACTGACTCGCTGCGCTCGGTCGTTTCGGCTGCGGCGAGCGGTATCAGCTCACTCAAAGGCGGTA  
ATACGGTTATCCACAGAATCAGGGGATAACGCAGGAAAGAATATGTGAGCAAAAGGCCAGCAAAAGGCCAGGAACCG  
TAAAAGGCCGCGTTGCTGGCGTTTTTCCATAGGCTCCGCCCCCTGACGAGCATCACAAAATCGACGCTCAAGTC

AGAGGTGGCGAAACCCGACAGGACTATAAAGATACCAGGCGTTTTCCCCCTGGAAGCTCCCTCGTGCGCTCTCCTGTT  
CCGACCCTGCCGCTTACCGGATACCTGTCCGCCTTTCTCCCTTCGGGAAGCGTGGCGCTTTCTCATAGCTCACGCTG  
TAGGTATCTCAGTTCGGTGTAGGTCGTTCCGCTCCAAGCTGGGCTGTGTGCACGAACCCCGTTCCAGCCCGACCGCT  
GCGCCTTATCCGGTAACTATCGTCTTGAGTCCAACCCGGTAAGACACGACTTATCGCCACTGGCAGCAGCCACTGGT  
AACAGGATTAGCAGAGCGAGGTATGTAGGCGGTGCTACAGAGTTCCTTGAAGTGGTGGCCTAACTACGGCTACACTAG  
AAGGACAGTATTTGGTATCTGCGCTCTGCTGAAGCCAGTTACCTTCGGAAAAAGAGTTGGTAGCTCTTGATCCGGCA  
AACAAACCACCGCTGGTAGCGGTGGTTTTTTTTGTTTGAAGCAGCAGATTACGCGCAGAAAAAAGGATCTCAAGAA  
GATCCTTTGATCTTTTCTACGGGGTCTGACGCTCAGTGGAAACGAAAACTCACGTTAAGGGATTTTGGTCATGAGATT  
ATCAAAAAGGATCTTACCTAGATCCTTTTAAATTAATAAATGAAGTTTTAAATCAATCTAAAGTATATATGAGTAAA  
CTTGGTCTGACAGTTACCAATGCTTAATCAGTGAGGCACCTATCTCAGCGATCTGTCTATTTTCGTTTCATCCATAGTT  
GCCTGACTCCCCGCTCGTGTAGATAACTACGATACGGGAGGGCTTACCATCTGGCCCCAGTGTGCAATGATACCGCG  
AGACCCACGCTCACCGGCTCCAGATTTATCAGCAATAAACACGACCCGCGGAAGGGCCGAGCGCAGAAGTGGTCCCTG  
CAACTTTATCCGCTCCATCCAGTCTATTAATTGTTGCCGGGAAGCTAGAGTAAGTAGTTCGCCAGTTAATAGTTTTG  
CGCAACGTTGTTGCCATTGCTACAGGCATCGTGGTGTACGCTCGTCTGTTTGGTATGGCTTCATTCAGCTCCGGTTC  
CCAACGATCAAGGCGAGTTACATGATCCCCATGTTGTGCAAAAAAGCGGTTAGCTCCTTCGGTCTCCGATCGTTG  
TCAGAAGTAAGTTGGCCGAGTGTATCACTCATGGTTATGGCAGCACTGCATAATTCTCTTACTGTCATGCCATCC  
GTAAGATGCTTTTCTGTGACTGGTGTACTCAACCAAGTCATTCTGAGAATAGTGTATGCGGCGACCGAGTTGCTC  
TTGCCCGGCGTCAATACGGGATAATACCGCGCCACATAGCAGAACTTTAAAAGTGTCTCATATTGGAAAACGTTCTT  
CGGGGCGAAAACCTCTCAAGGATCTTACCCTGTTGAGATCCAGTTCGATGTAACCCACTCGTGCACCCAACCTGATCT  
TCAGCATCTTTTACTTTACCAGCGTTTCTGGGTGAGCAAAAACAGGAAGGCAAAAATGCCGCAAAAAAGGGAATAAG  
GGCGACACGGAAATGTTGAATACTCATACTCTTCTTTTTCAATATTATTGAAGCATTATCAGGGTTATTGTCTCA  
TGAGCGGATACATATTTGAATGTATTTAGAAAAATAACAAATAGGGGTTCCGCGCACATTTCCCCGAAAAGTGCCA  
CCTGACGTCTAAGAAACCATTATTATCATGACATTAACCTATAAAAAATAGGCGTATCACGAGGCCCTTTTCGTCTTCA  
C

**pSH642: protein sequence of His<sub>6</sub>-HaloTag-OsPho1ΔL80 (1170 aa; 132.1 kDa)**

MRGSHHHHHHGSIEIGTGFPFDPHYVEVLGERMHYVDVGRDGTPLVFLHGNPTSSYVWRNIIPHVAPTHRCIAPDLI  
GMGKSDKPDLYFFDDHVRFMDFIEALGLEEVVLVIHDWGSALGFHWAKRNPVVKGI AFMEFIRPIPTWDEWPEF  
ARETFQAFRTTDDVGRKLIIDQNVFIEGTLPMGVVRPLTEVEMDHYREPFLNPDVREPLWRFPNELPIAGEPANIVAL  
VEEYMDWLHQSPVPKLLFWGTGPGVLIIPAEARLAKSLPNCKAVDIGPGLNLLQEDNPDIGSEIARWLSTLEISGE  
PTTEDLYFQSDNAMASVASDRGVQGSVSPEEEEISSVLNSIDSSTIASNIKHAEFTPVFSPEHFSPLKAYHATAKSV  
LDTLIMNWNATYDYYDRNTNVKQAYYLSMEFLQGRALTNVGNLELTGQYAEALQQLGHSLEDVATQEPDAALGNGL  
GRLASCFLDSLATLNYPAWG YGLRYKHGLFKQIITKDGQEEVAENWLEMGNPWEIVRTDVSYPVKFYGKVVVEGTDGR  
MHWIGGENIKVVAHDIPIPGYKTKTNNLRLLWSTTVPSQDFDLEAFNAGDHASAYEAHLNAEKICHVLYPGDESPEG  
KVLRLKQYTLCSASLQDI IARFERRAGDSL SWEDFPSKVAVQMNDTHPTLCIPELMRILIDVKGLSWNEAWSITER  
TVAYTNHTVLP EALEKWSLDIMQKLLPRHVEIEKIDGELMNI IISKYGTEDTSLKKKIKEMRIENS DPKLPRVV  
RMANLCVVGHSVNGVAAIHSEIVKEDVFN SFYEMWPAKFQNKTNVT PRRWIRFCNPESAIISKWIGSDDWV LNT  
DKLAE LKKFADDEDLQSEWRAAKKANKVQVSLIREKTGYIVSPDAMFDVQVKRIHEYKRQLLNILGIVRYKKMKE  
MSAKDRINSFVPRVCI FGGKAFATYVQAKRIVKFITDVAATVNHDPEIGDLLKVVFI PDYNVSVAEALIPASELSQH  
I STAGMEASGT SNMKFAMNGCILIGTLDGANVEIREEVGEENFFLFGAEAEH IAGLRKERAQGKFVDPDRFEVEVKRF  
VRSGVFGTYNYDDLMSLEGNEGYGRADYFLVGKDFPSYIECQEKVDKAYRDQKLWTRMSILNTASSSKFNSDRTIH  
EYAKDIWDIKPVILP

=====  
**pSH757: DNA sequence of His<sub>6</sub>-HaloTag-OsDpe1**

CTCGAGAAATCATAAAAAATTTATTTGCTTTGTGAGCGGATAACAATTATAATAGATTCAATTGTGAGCGGATAACA  
ATTTACACAGAATTCATTAAGAGGAGAAATTA ACTATGAGAGGATCGCATCACCATCACCATCACGGATCCGAAA  
BamHI  
TCGGTACTGGCTTTCCATTGACCCCCATTATGTGGAAGTCCTGGGCGAGCGCATGCACTACGTCGATGTTGGTCCG  
CGCGATGGCACCCCTGTGCTGTTTCTGCACGGTAACCCGACCTCCTCCTACGTGTGGCGCAACATCATCCCGCATGT  
TGCACCGACCCATCGCTGCATTGCTCCAGACCTGATCGGTATGGGCAAATCCGACAAACCAGACCTGGGTTATTTCT  
TCGACGACCACGTCCGCTTCATGGATGCCTTCATCGAAGCCCTGGGTCTGGAAGAGGTCGTCCTGGTCATTACAGAC  
TGGGGCTCCGCTCTGGGTTTTCACTGGGCCAAGCGCAATCCAGAGCGCGTCAAAGGTATTGCATTTATGGAGTTCAT  
CCGCCCTATCCCGACCTGGGACGAATGGCCAGAATTTGCCCGGAGACCTTCCAGGCCTTCCGCACCACCGACGTCG



GCCGCAAGCTGATCATCGATCAGAACGTTTTTATCGAGGGTACGCTGCCGATGGGTGTCGTCGCCCGCTGACTGAA  
GTCGAGATGGACCATTACCGCGAGCCGTTCTGAATCCTGTTGACCGCGAGCCACTGTGGCGCTTCCCAAACGAGCT  
GCCAATCGCCGGTGAAGCCAGCGAACATCGTCGCGCTGGTCAAGAATACATGGACTGGCTGCACCAGTCCCCTGTCC  
CGAAGCTGCTGTTCTGGGGCACCCAGGCGTTCTGATCCCACCGGCCGAAGCCGCTCGCCTGGCCAAAAGCCTGCCT  
AACTGCAAGGCTGTGGACATCGGCCCGGGTCTGAATCTGCTGCAAGAAGACAACCCGGACCTGATCGGCAGCGAGAT  
CGCGCGCTGGCTGTGACGCTCGAGATTTCCGGCGAGCCAACCACTGAGGATCTGTACTTTTCCAGAGCGATAACGCCA  
TGGCGGTGGCGCCCGACAAGGAGGAGGCGGGCGGGTGTCTGACAAAGCGGTGAAGGTGGCGGTGGCAGCTCCC

NcoI

GACAGGGCGGGCGGTGGCCCGGGTGGGCGTCCGGGAGGAGCTCCCCGAGGGGTACGACCAGATGATGCCGGCCGTGGA  
GGAGGCGCGGGCGGGCGAGCCGGGGTGTCTGCTGCACCCGACCTCGCTCCGCGGCCCGCACGGCATCGGCGACCTCG  
GCGACGAGGCGGTGCCTTCTCGCTGGCTCCGCGACGCGGGTGCACGCTCTGGCAGGTTCTTCCGCTTGTTC  
CCGGGAAGGAAGTCTGGGGAGGATGGCTCTCCATATTCAGGACAGGATGCAAACCTGTGGTAATACCCTATTAATTT  
ACTTGAAGAGCTTGTAAAAGATGGGTTGTTGATGGAGAATGAACTACCTGACCCCTTGGATATGGAGTATGTTGAAT  
TTGACACCGTTGCCAATCTGAAAGAACCTCTTATTGCAAAGGCTGCAGAGAGGCTCCTACTGAGCCGTGGAGAGCTC  
AGAACGCAATATGACTGCTTCAAGAAAAATCCAAATATTTAGGTTGGCTTGAAGATGCTGCACTTTTTGCTGCTAT  
TGACAGAAGTATTGATGCATTATCCTGGTATGAGTGGCCTGAACCTCTGAAAAACCGACATCTCAGGGCCTTGAAG  
ACATATATCAAAAACAGAAGGATTTTCATAGAGATATTTATGGCTCAACAATTCTTATTTCAAAGGCAGTGGCAGCGA  
ATTCGTAATATGCAAAGAAGTTGGGTATCAGCATAATGGGTGACATGCCCATATATGTTGGCTACCATAGTGCAGA  
TGTTTGGGCAAACAGGAAATCGTTTTTGGTGGACAAGAATGGTTTTCCGACTTTTGTAGTGGTGTCCACCTGATG  
CATTTAGTGAACCTGGTCAGCTTTGGAACAGTCCATTGTACGACTGGAAAGCTATGGAAGCAGGTGGATTTGAATGG  
TGGATAAAAAGGATTAATCGTGCCTTGTATTTGTATGATGAGTTCGATATAGACCATTTCCGGGGGCTTGCAGGTTT  
TTGGGCAGTTCCTTCTGAGTCAAAGTAGCGCTGGTTGGAAGCTGGAGGGCTGGACCGAGGAATGCATTTTTTGTATG  
CATTATTTCAAAGCTGTCCGTAGAATAAACATAATAGCAGAAGACCTGGGGGTGATAACAGAAGATGTTGTTGACCTA  
AGGAAGTCTATTGAGGCTCCTGGAATGGCAGTTCCTCAGTTTTGCTTTTTGGCGGTGGTTCTGACAATCCACACTTGC  
CCATAACCATGAATTTGATCAAGTAGTATACACCGGAACACACGACAATGACACGGTTATTGGTTGGTGGCAAACCT  
TACCAGAGGAAGAGAAGCAGACTGTGTTCAAGTATCTGCCTGAGGCTAATAGGACTGAAATCTCATGGGCACTGATC  
ACTGCTGCCCTCTCTCAGTTGCAAGGACATCCATGGTAACCATGCAGGACATTCTTGGCCTCGACAGTCTGTCTAG  
AATGAATACTCCAGCTACACAGAAAGGGAACCTGGAGATGGAGGATGCCGAGCTCTGTGAGCTTCGACAGCTCAGCC  
CTGAAGCGGCGAAGCTGAAGGAATTGCTTGGACTGTACAACCGGCTCTAAGTCGACCTCGAGCCCAAGCTTAATTAGC

SalI PstI HindIII

TGAGCTTGGACTCCTGTTGATAGATCCAGTAATGACCTCAGAACTCCATCTGGATTTGTTTCAAGAACGCTCGGTTGCC  
GCCGGGCGTTTTTTTATTGGTGAGAATCCAAGCTAGCTTGGCGAGATTTTTCAGGAGCTAAGGAAGCTAAAATGGAGAA  
AAAAATCACTGGATATAACCACCGTTGATATATCCCAATGGCATCGTAAAGAACATTTTTGAGGCATTTTTCAGTCAGTTG  
CTCAATGTACCTATAACCAGACCGTTCAGCTGGATATTACGGCCTTTTTTAAAGACCGTAAAGAAAAATAAGCACAAAG  
TTTTATCCGGCCTTTATTACATTCTTGCCCGCTGATGAATGCTCATCCGGAATTTTCGTATGGCAATGAAAGACGG  
TGAGCTGGTGATATGGGATAGTGTTCACCCTTGTACACCGTTTTTCCATGAGCAAACCTGAAACGTTTTTCATCGCTCT  
GGAGTGAATACCACGACGATTTCCGGCAGTTTCTACACATATATTGCAAGATGTGGCGTGTACGGTGAAAACCTG  
GCCTATTTCCCTAAAGGGTTTTATTGAGAATATGTTTTTCTGCTCAGCCAATCCCTGGGTGAGTTTTCACCAGTTTTGA  
TTTTAAACGTGGCCAATATGGACAACCTTCTTCCGCCCCGTTTTTACCATGCATGGGCAAATATTATACGCAAGGCGAC  
AAGGTGCTGATGCCGCTGGCGATTGAGGTTTCATCATGCCGTTTTGTGATGGCTTCCATGTCCGCGAGAATGCTTAATGA  
ATTACAACAGTACTGCGATGAGTGGCAGGGCGGGGCGTAATTTTTTTAAGGCAGTTATTGGTGCCCTTAAACGCCTG  
GGGTAATGACTCTCTAGCTTGGAGCATCAAATAAAACGAAAGGCTCAGTCGAAAGACTGGGCCTTTTCGTTTTATCTG  
TTGTTTTGTCCGGTGAACGCTCTCCTGAGTAGGACAAATCCGCCCTCTAGAGCTGCCTCGCGCGTTTTCCGGTATGACGG  
TGAAAACCTCTGACACATGCAGCTCCCGGAGACGGTACAGCTTGTCTGTAAGCGGATGCCGGGAGCAGACAAGCCC  
GTCAGGGCGCGTCAGCGGGTGTGGCGGGTGTCCGGGCGCAGCCATGACCCAGTCACGTAGCGATAGCGGAGTGTAT  
ACTGGCTTAACTATGCGGCATCAGAGCAGATTGTACTGAGATGCACCATATGCGGTGTGAAATACCGCACAGATGC  
GTAAGGAGAAAAATACCGCATCAGGCGCTCTTCCGCTTCTCGCTCACTGACTCGCTGCGCTCGGTCGTTCCGGCTGCG  
GCGAGCGGTATCAGCTCACTCAAAGGCGGTAATACGGTTATCCACAGAATCAGGGGATAACGCAGGAAAGAACATGT  
GAGCAAAAGGCCAGCAAAAGGCCAGGAACCGTAAAAAGGCCGCGTTGCTGGCGTTTTTCCATAGGCTCCGCCCCCT  
GACGAGCATCACAAAATCGACGCTCAAGTCAGAGGTGGCGAAACCCGACAGGACTATAAAGATACCAGGCGTTTTCC  
CCCTGGAAGCTCCCTCGTGCCTCTCCTGTTCCGACCCTGCCGCTTACCAGGATACCTGTCCGCTTTTCTCCCTTCGG  
GAAGCGTGGCGCTTTCTCATAGCTCACGCTGTAGGTATCTCAGTTCCGGTGTAGGTGCTTCCGCTCCAAGCTGGGCTGT  
GTGCACGAACCCCCGTTTCCGCCCCGCTGCGCCTTATCCGGTAACTATCGTCTTGGAGTCCAACCCGGTAAGACA  
CGACTTATCGCCACTGGCAGCAGCCACTGGTAACAGGATTAGCAGAGCGAGGTATGTAGGCGGTGCTACAGAGTTCT  
TGAAGTGGTGGCCTAACTACGGCTACACTAGAAGGACAGTATTTGGTATCTGCGCTCTGCTGAAGCCAGTTACCTTC  
GGAAAAAGAGTTGGTAGCTCTTGTATCCGGCAAACAACCCAGGCTGGTAGCGGTGGTTTTTTTTGTTTGAAGCAGCA  
GATTACGCGCAGAAAAAAGGATCTCAAGAAGATCCTTTGATCTTTTCTACGGGGTCTGACGCTCAGTGAACGAAA

ACTCACGTTAAGGGATTTTGGTCATGAGATTATCAAAAAGGATCTTCACCTAGATCCTTTTAAATTAATAAATGAAGT  
TTTAAATCAATCTAAAGTATATATGAGTAAACTTGGTCTGACAGTTACCAATGCTTAATCAGTGAGGCACCTATCTC  
AGCGATCTGTCTATTTTCGTTTCATCCATAGTTGCCTGACTCCCCGTCGTGTAGATAACTACGATACGGGAGGGCTTAC  
CATCTGGCCCCAGTGTGCAATGATACCGCGAGACCCACGCTCACCGGCTCCAGATTTATCAGCAATAAACCCAGCCA  
GCCGGAAGGGCCGAGCGCAGAAGTGGTCCTGCAACTTTATCCGCCTCCATCCAGTCTATTAATTGTTGCCGGGAAGC  
TAGAGTAAGTAGTTTCGCCAGTTAATAGTTTTCGCAACGTTGTTGCCATTGCTACAGGCATCGTGGTGTACGCTCGT  
CGTTTGGTATGGCTTCATTACAGCTCCGGTTCCTCAACGATCAAGGCGAGTTACATGATCCCCCATGTTGTGCAAAAA  
GCGGTTAGCTCCTTCGGTCTCCGATCGTTGTGAGAAGTAAGTTGGCCGAGTGTATCACTCATGGTTATGGCAGC  
ACTGCATAATTCTCTTACTGTATGCCATCCGTAAGATGCTTTTCTGTGACTGGTGTGAGTACTCAACCAAGTCATTCT  
GAGAATAGTGTATGCGGCGACCGAGTTGCTCTTGCCTGGCGTCAATACGGGATAATACCGCGCCACATAGCAGA  
TTAAAAGTGCTCATCATTGGAAAACGTTCTTTCGGGGCGAAAACCTCAAGGATCTTACCCTGTTGAGATCCAGTTC  
GATGTAACCCACTCGTGCACCCAACTGATCTTTCAGCATCTTTTACTTTTACCAGCGTTTCTGGGTGAGCAAAAACAG  
GAAGGCAAAATGCCGCAAAAAAGGAATAAGGGCGACACGAAATGTTGAATACTCATACTCTTCTTTTTTCAATAT  
TATTGAAGCATTATCAGGGTTATTGTCTCATGAGCGGATACATATTTGAATGTATTTAGAAAAATAAACAAATAGG  
GGTTCGCGCACATTTCCCCGAAAAGTGCCACCTGACGTCTAAGAAACCATTATTATCATGACATTAACCTATAAAA  
ATAGGCGTATCACGAGGCCCTTTCGTCTTCAC

**pSH757: protein sequence of His<sub>6</sub>-HaloTag-OsDpe1 (876 aa; 98.5 kDa)**

MRGSHHHHHHSEIGTGFPDPHYVEVLGERMHYVDVGPDPVFLHGNPTSSYVWRNIIPHVAPTHRCIAPDLI  
GMGKSDKPDLYFFDDHVRFMDFIEALGLEEVVLVIHDWGSALGFHWAKRNPVVKGI AFMEFIRPIPTWDEWPEF  
ARETFQAFRTTDVGRKLIIDQNVFIEGTLPMGVVRPLTEVEMDHYREPFLNPVDREPLWRFPNELPIAGEPANIVAL  
VEEYMDWLHQSPVPKLLFWGTPGVLIIPAEARLAKSLPNCKAVDIGPGLNLLQEDNPDIGSEIARWLSTLEISGE  
PTTEDLYFQSDNAMAVAPDKEEAAAVALDKAVKVAVAAPDRAAVA AVGVGEELPEGYDQMMPAVEEARRRRRAGVLLH  
PTSLRPHGIGDLGDEAVAFWLRLDAGCTLWQVLPVPPGRKSGEDGSPYSGQDANCNTLLISLEELVKDGLLME  
NELPDPLDMEYVEFDTVANLKEPLIAKAAERLLLSRGELRTQYDCFKKNPNI SGWLEDAALFAAIDRSIDALSWYEW  
PEPLKNRHLRALEDIYQKQKDFIEIFMAQQFLFQRQWRIRKYAKKLGISIMGDMPIYVGYHSADVWANRKSFLLDK  
NGFPTFVSGVPPDAFSETGQLWNSPLYDWKAMEAGGFEEWIKRINRALDLYDEFRIDHFRGLAGFWAVPSESKVALV  
GSRAGPRNAFFDALFKAVGRINI IAEDLVITEDVVDLRKSI EAPGMVQLQFAFGGSDNPHLPHNHEFDQVVYTG  
THDNDTVIGWWQTLPEEEKQTVFKYLPEANRTEISWALITAALSSVARTSMVTMQDILGLDSSARMNTPATQKGNWR  
WRMPSSVSFDSLSPAAKLKELLGLYNRL

**Figure S3. Specificities of anti-OsPho1 and anti-OsDpe1 antibodies.** Soluble protein extracts were prepared from immature seeds of rice TC65 (wildtype) and BMF136 (pho1 null mutant) as described in Experimental Procedures. Seed extracts (20  $\mu\text{g}$  each) and antigen proteins (2 and 0.5  $\mu\text{g}$  for CBB staining; 0.4 and 0.1  $\mu\text{g}$  for immunoblot analysis) were resolved on a 12% SDS-polyacrylamide gel. Antibody titers used are as indicated below the immunoblot results.

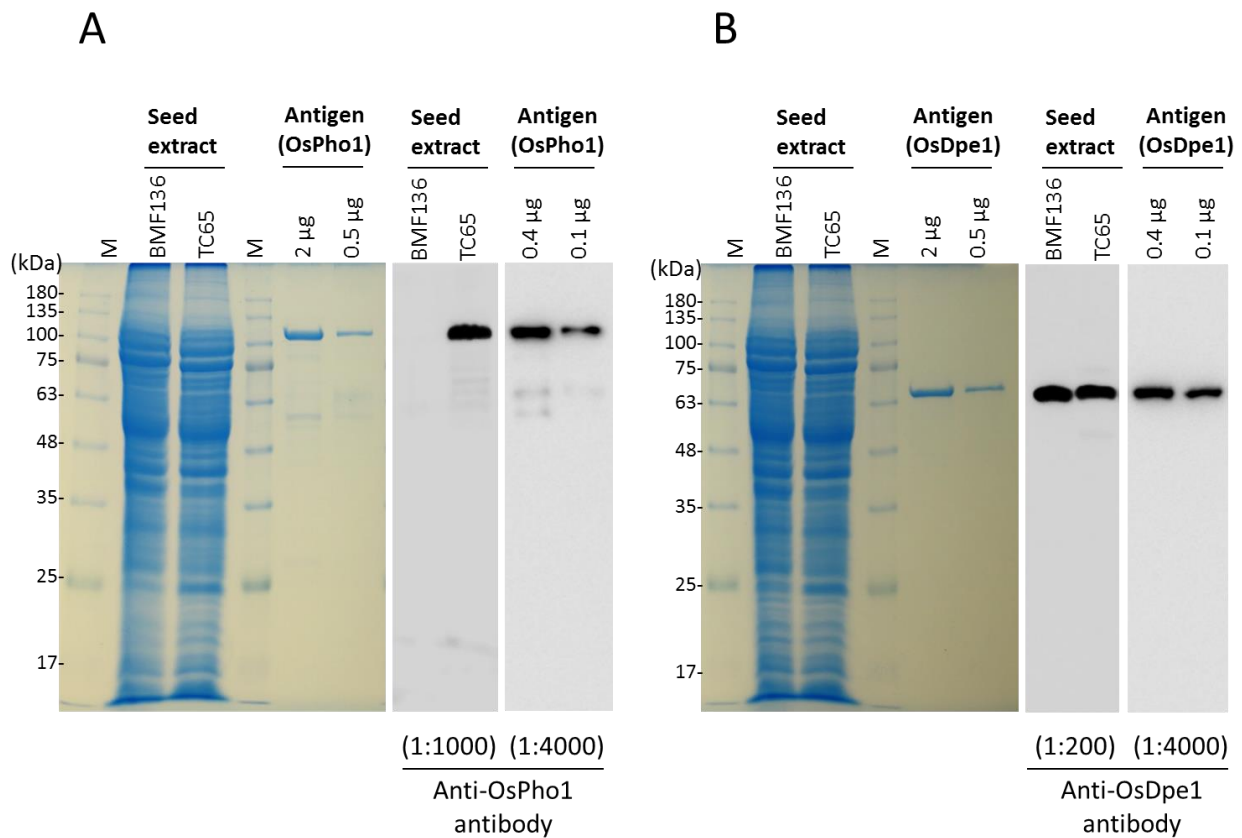

**Figure S4. Molecular weight determination of OsDpe1 (A) and OsPho1:OsDpe1 complex (B) by Superdex-200 column chromatography.** Size markers used were: a, bovine albumin (66 kDa); b, alcohol dehydrogenase (150 kDa); c,  $\beta$ -amylase (200 kDa); d, OsPho1 (210 kDa); e, apoferritin (443 kDa); f, thyroglobulin (669 kDa); g, OsDpe1.  $v$ , elution volume;  $v_0$ , void volume of the column.

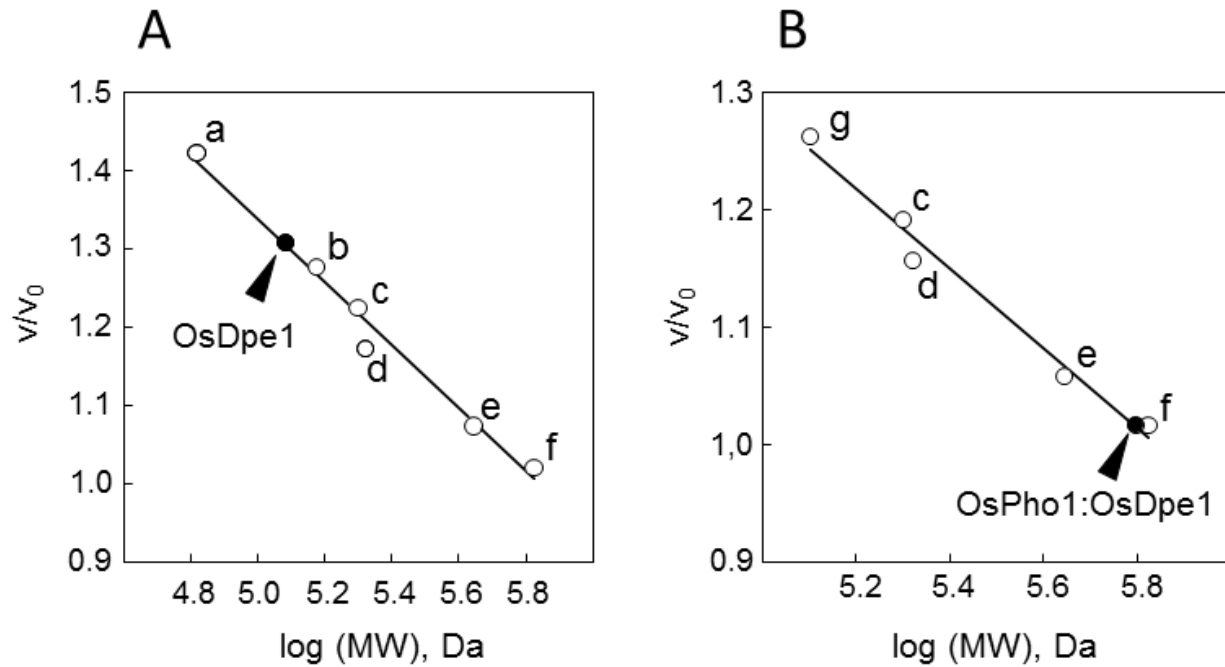

**Figure S5. Elution profiles of mixtures of OsPho1 and OsDpe1 recombinant proteins at different molar ratios on Superdex-200 column chromatography.** (From top to bottom) 1:2 ratio, a mixture of 340  $\mu$ g OsPho1 and 400  $\mu$ g of OsDpe1; 1:1 ratio, a mixture of 340  $\mu$ g OsPho1 and 200  $\mu$ g of OsDpe1; 2:1 ratio, a mixture of 680  $\mu$ g OsPho1 and 200  $\mu$ g of OsDpe1. The fractions were analyzed by SDS-PAGE. Shown are CBB-stained SDS-polyacrylamide gels.

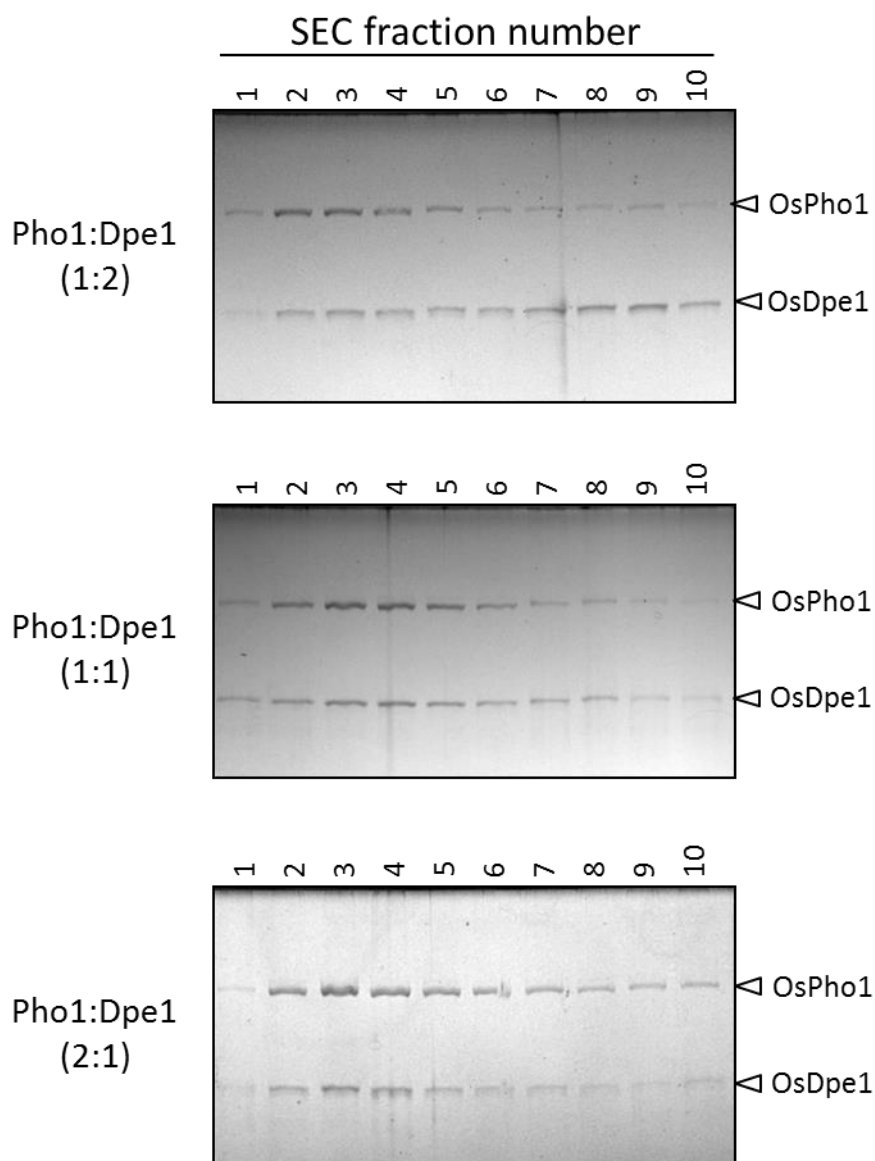

**Figure S6. Reaction profiles of OsDpe1 (0.5  $\mu$ g) in the presence of equal molar amounts of G5 alone (upper panel) and G5 and G1 (lower panel). FACE was performed with aliquots of the reaction products. The first and last lanes contain size markers.**

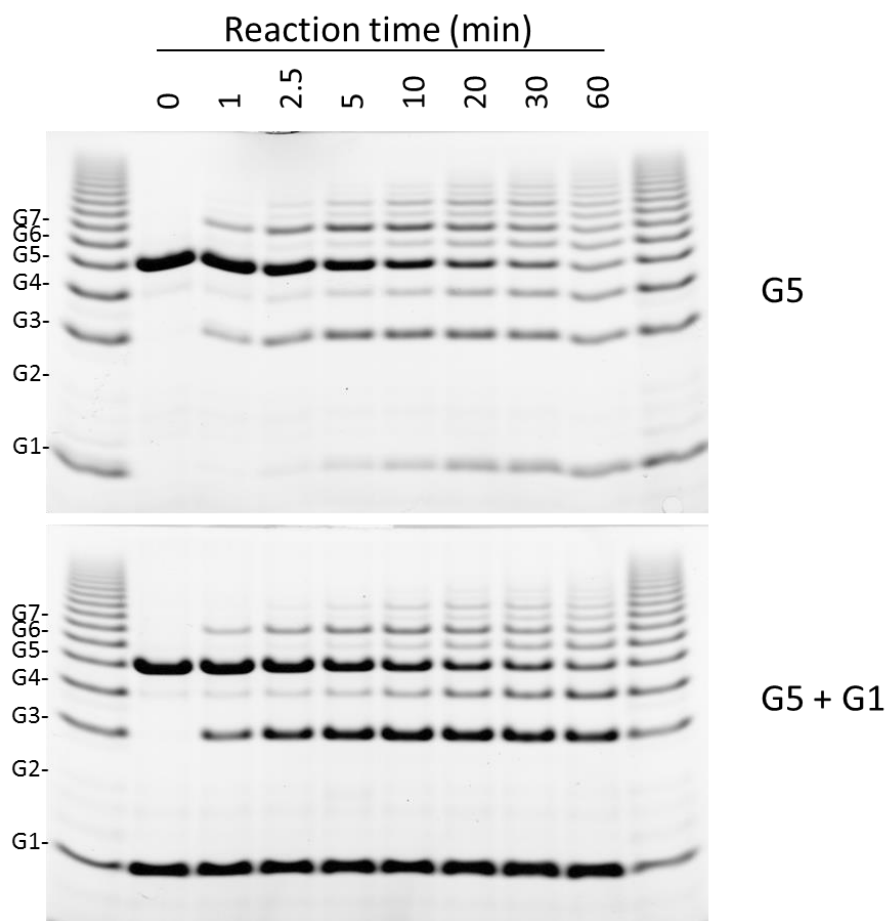

**Figure S7. Phosphoprotein assay of the recombinant proteins.** 2 µg each of the purified proteins (OsPho1, OsPho1ΔL80, OsDpe1, a mixture of OsPho1 and OsDpe1, HT-GFP, HT-OsPho1, and HT-OsDpe1) used in this study were resolved on 12% SDS-polyacrylamide gel and phosphoprotein was detected using Pro-Q Diamond phosphoprotein stain (Invitrogen). Bovine serum albumin (BSA, fraction V) and ovalbumin (two serine residues/molecule for phosphorylation; see below for reference) from Sigma-Aldrich were used as negative and positive controls, respectively. (A) CBB-stained SDS-polyacrylamide gel; (B) Pro-Q Diamond stained gel under ultraviolet light; (C) Normalized fluorescence of the signals (arbitrary unit) = fluorescence strength of band/(CBB staining intensity of band x Molecular weight of monomeric protein).

## Reference

Kinoshita-Kikuta E1, Kinoshita E, Koike T (2012) Separation and identification of four distinct serine-phosphorylation states of ovalbumin by Phos-tag affinity electrophoresis. *Electrophoresis* 33:849-855. doi: 10.1002/elps.201100518

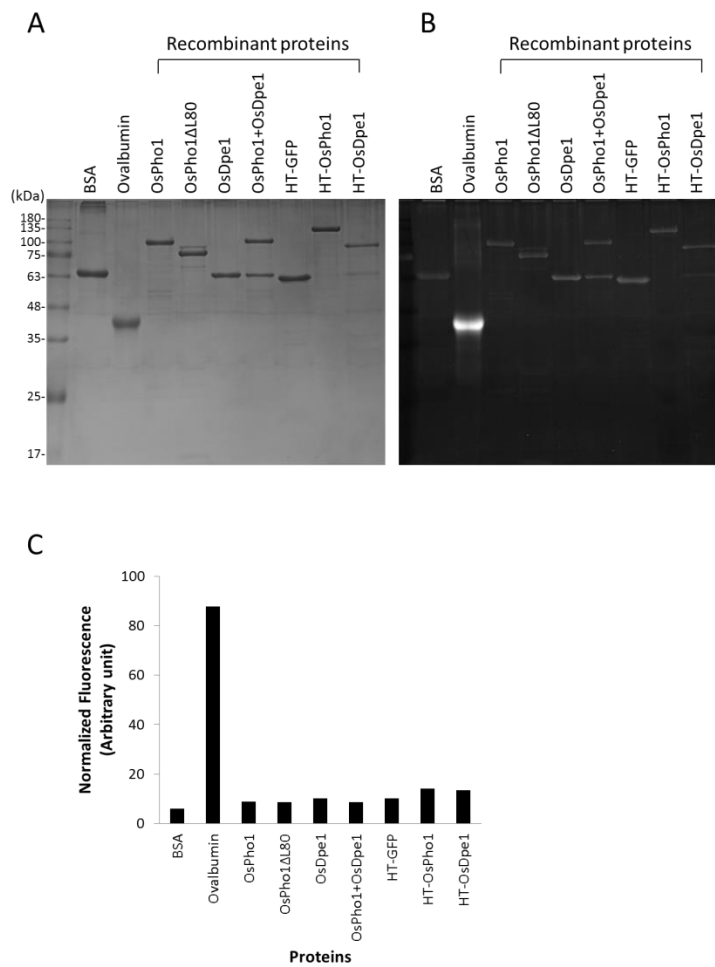

Supplement: 10.1074_M116.735449_jbc.M116.735449-1.pdf [file 10.1074_M116.735449_jbc.M116.735449-1.pdf]
